# Supplementary material for: A two-dimensional highly ordered mesoporous carbon/graphene nanocomposite for electrochemical double layer capacitors: effects of electrical and ionic conduction pathways
Source: Royal Society of Chemistry journal article supplement (doi:10.1039/c4ta05863a), 2014-12-02
Supplement: c4ta05863a1.pdf [file c4ta05863a1.pdf]

## **Electronic Supplementary Information (ESI)**

### **A Two Dimensional Highly Ordered Mesoporous Carbon/Graphene Nanocomposite for Supercapacitors: Effect of Electrical and Ionic Conduction Pathways**

**Chang-Wook Lee,<sup>a</sup> Seung-Beom Yoon,<sup>a</sup> Hyun-Kyung Kim,<sup>a</sup> Joah Han,<sup>b</sup> Kwang Chul Roh,<sup>\*b</sup> and  
Kwang-Bum Kim<sup>\*a</sup>**

*<sup>a</sup> Department of Materials Science & Engineering, Yonsei University, 50 Yonsei-ro, Seodaemun-gu,  
Seoul 120-749, Republic of Korea. Fax: +82-2-312-5375; Tel: +82-2-365-7745; E-mail:  
kbkim@yonsei.ac.kr*

*<sup>b</sup> Energy Efficient Materials Team, Energy & Environmental Division, Korea Institute of Ceramic  
Engineering & Technology, 233-5 Gasan-dong, Gueemcheon-gu, Seoul 153-801, Republic of Korea.  
Fax: +82-2-3282-2475; Tel: +82-2-3282-2463; E-mail: rkc@kicet.re.kr*

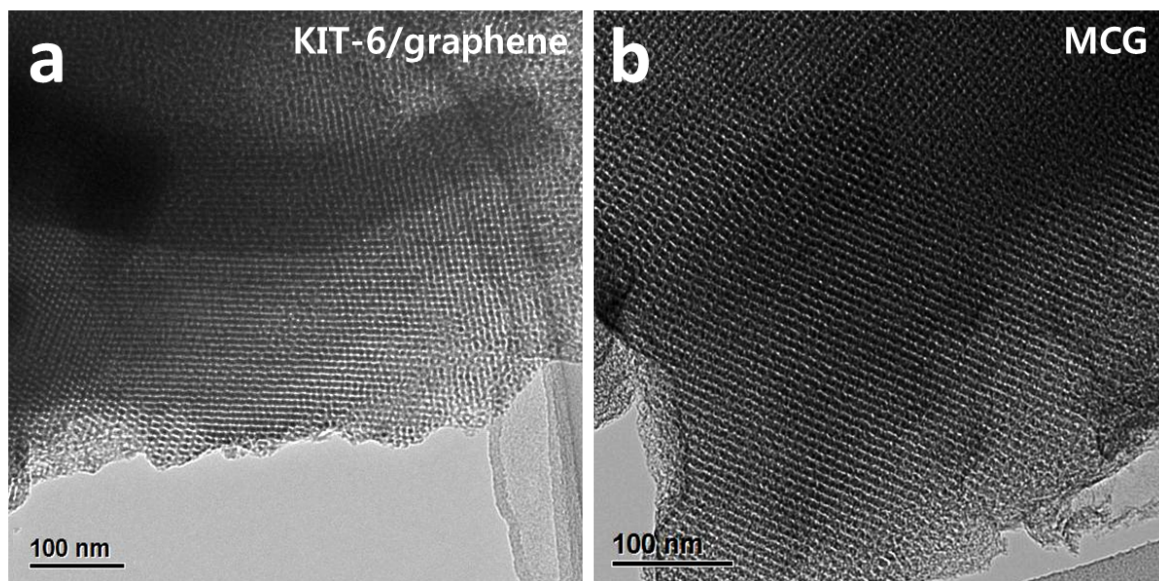

**Figure S1.** Typical TEM images of (a) KG and (b) MCG.

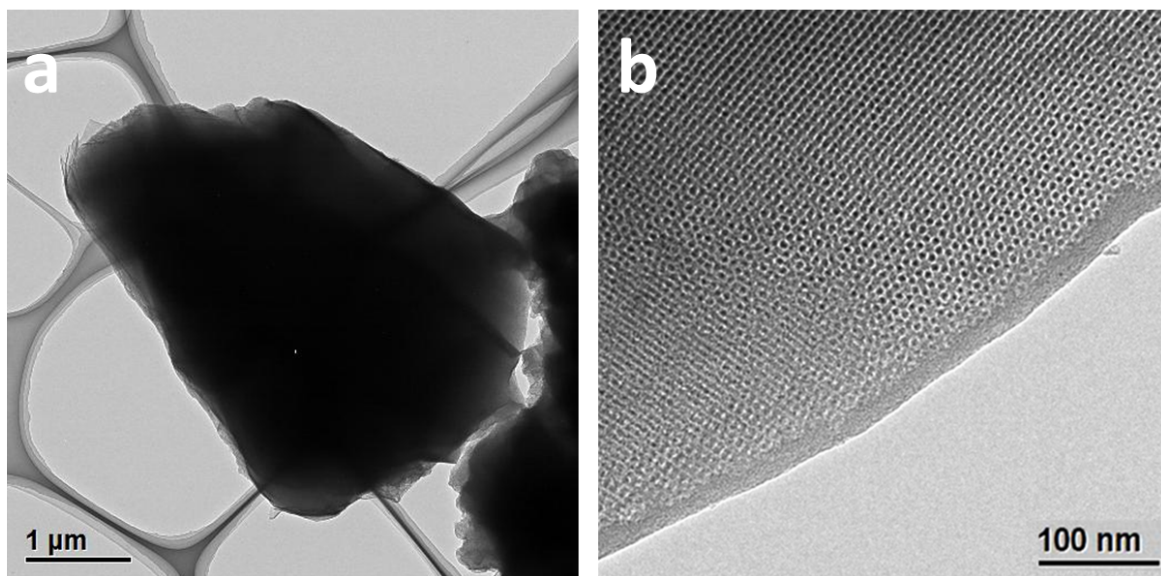

**Figure S2.** Typical TEM image and (c) HRTEM image of MC.

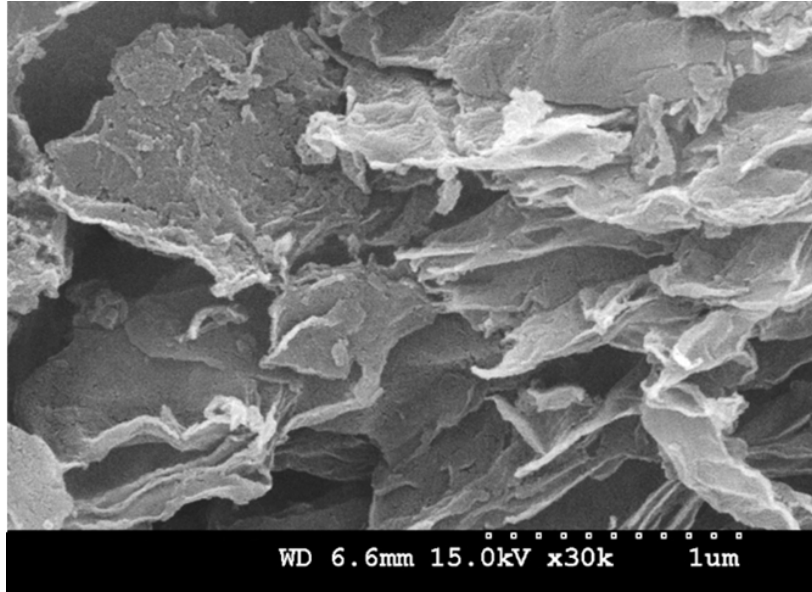

**Figure S3.** Typical SEM image of MCG.

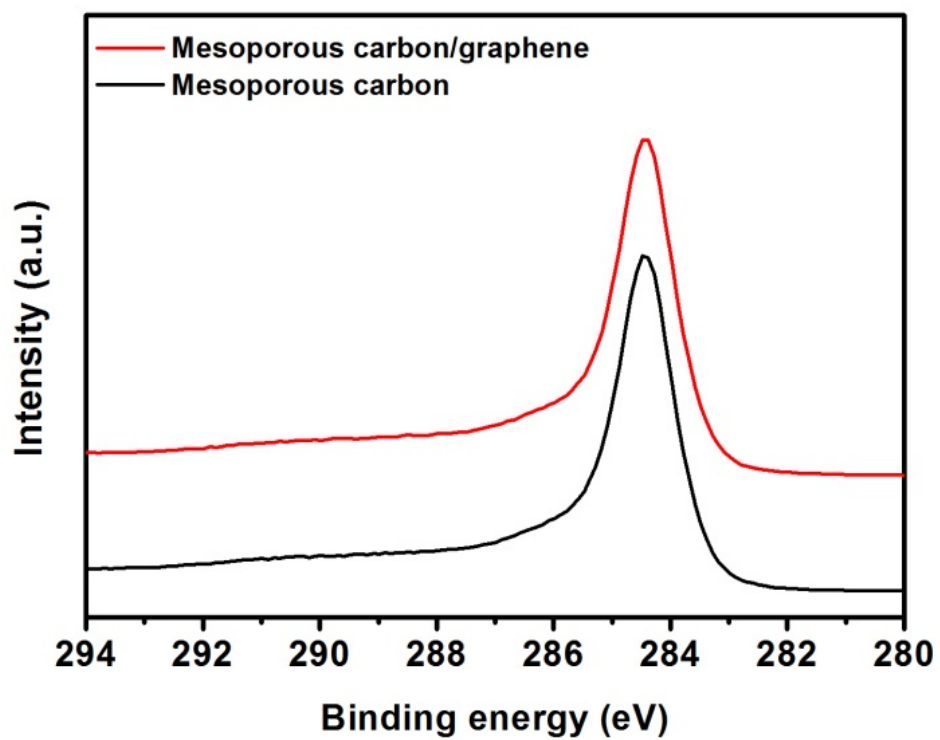

**Figure S4.** C1s XPS spectra of MCG and MC.

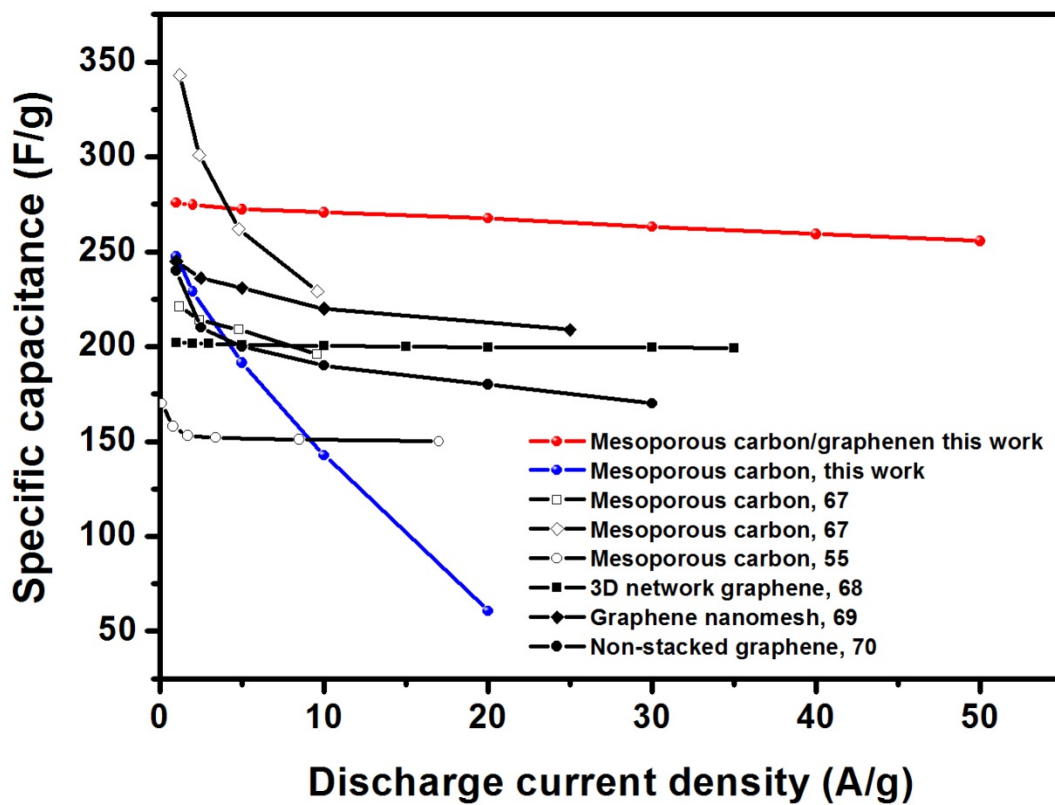

Figure S5. High rate capability of MCG and MC at different current densities of 1–50 A g<sup>-1</sup>.
